# Supplementary material for: Towards meaningful youth participation in science-policy processes: a case study of the Youth in Landscapes Initiative
Source: Oxford University Press journal article supplement (doi:10.1525/elementa.327), 2018-01-01
Supplement: elementa-6-327-s1.docx [file elementa-6-327-s1.docx]

**Towards meaningful youth participation in science-policy processes: a case study of the Youth in Landscapes Initiative**

Sarah Dickson-Hoyle1CO*, Michelle Kovacevic2CO, Marina Cherbonnier3, and Kimberly A. Nicholas4

1 International Forestry Students’ Association, Melbourne, Australia

2 Center for International Forestry Research (CIFOR), Bogor, Indonesia

3 YPARD: Young Professionals for Agricultural Development, Rome, Italy

4 Lund University Centre for Sustainability Studies, Lund, Sweden

CO Joint first authorship

*Corresponding author: Sarah Dickson-Hoyle s.dicksonhoyle@gmail.com

**Appendix S1: Agenda for youth in landscapes program**

Masterclasses addressed five key skills required for effective conference participation - facilitating a discussion, pitching an idea, networking, understanding the subject matter (in this case landscapes) and thinking critically about that subject matter.

| **Youth masterclasses**  **Friday December 5th**  **Sol De Oro Hotel, Lima, Peru** | | | |
| --- | --- | --- | --- |
| **Time** | **Program** | | |
| 08:30 - 08:45 | Introduction  Recap of webinar learning and pre-conference activities. | | |
|  | Concurrent masterclasses (15-20 participants in each) | | |
| 08:55 - 10:55 | (Part 1) Contributing to a discussion  *Articulating comments and questions.* | (Part 1) Critical thinking and understanding landscapes  *Active listening, how to find reliable information from diverse sources* | (Part 1) How to facilitate a discussion |
| 10:55 - 11:15 | **Break** | | |
| 11:15 - 13:15 | (Part 2) Pitching an idea  *Dragon's den + peer assessed assignment.* | (Part 2) Critical thinking and understanding landscapes  *Identify key argument points, addressing these points* | (Part 2) How to facilitate a discussion  *Peer assessed assignment* |
| 13:15 - 14:30 | Lunch | | |
| 14:30 - 15:00 | Debrief focusing on skills learned and how these skills can be put in practice during the 2014 GLF | | |
| 15:00 - 16:00 | Networking masterclass | | |
| 16:00 - 16:30 | Break | | |
| 16:30 -17:15 | Youth-professional networking + mentoring program launch | | |

Youth Session included round table discussions facilitated by youth on each of the core GLF themes

| **Youth Session 2014 GLF**  **December 6th**  **Westin Hotel and Convention Center, Lima, Peru** | |
| --- | --- |
| **Time** | **Program** |
| 08:30 - 08:40 | Introduction from MC/inspiring speaker |
| *08:40 - 08:50* | *Move to roundtables* |
| 08:50 - 10:50 | Roundtable discussions  · Eight discussion groups: Two groups of 25 people for [each theme](http://www.landscapes.org/glf-2014/about/objective-themes/) (moderated by "youth facilitators").  · In final 10 mins, two groups within each theme compare ideas to come up with a single pitch per theme |
| *10:00 - 10:20* | *Break with entertainment* |
| 10:50 - 12:15 | Dragon's Den (webcast, simultaneous interpreting English <> Espanol)  · Introduce expert panel members (representatives from GLF, negotiator, YOUNGO (youth rep to UNFCCC), research organization)  · Four "youth pitchers" pitch ideas (4-6 mins each)  · Feedback from panel and audience discussion |
| 12:15 - 12:30 | Consolidate recommendations  Awards (best presentation + people's choice, closing remarks and future directions |
